# Supplementary material
Source: ML conference proceedings conference paper supplement (https://openreview.net/forum?id=bGs1qWQ1Fx)
Supplement: supplementary_material [file attachment]

Table 5: Notations

|                               |                                                                                                                          |
|-------------------------------|--------------------------------------------------------------------------------------------------------------------------|
| $X_t$                         | multivariate time series input at timestamps $t$ , $X \in \mathbb{R}^{N \times T}$                                       |
| $x_t$                         | the multivariate values of $N$ series at timestamp $t$ , $x_t \in \mathbb{R}^N$                                          |
| $Y_t$                         | the next $\tau$ timestamps of multivariate time series, $Y_t \in \mathbb{R}^{N \times \tau}$                             |
| $\hat{Y}_t$                   | the prediction values of multivariate time series for next $\tau$ timestamps, $\hat{Y}_t \in \mathbb{R}^{N \times \tau}$ |
| $N$                           | the number of series                                                                                                     |
| $T$                           | the lookback window size                                                                                                 |
| $\tau$                        | the prediction length of multivariate time series forecasting                                                            |
| $\mathcal{G}_t$               | the hypervariate graph, $\mathcal{G}_t = \{X_t^{\mathcal{G}}, A_t^{\mathcal{G}}\}$ attributed to $X_t^{\mathcal{G}}$     |
| $X_t^{\mathcal{G}}$           | the nodes of the hypervariate graph, $X_t^{\mathcal{G}} \in \mathbb{R}^{NT \times 1}$                                    |
| $A_t^{\mathcal{G}}$           | the adjacency matrix of $\mathcal{G}_t$ , $A_t^{\mathcal{G}} \in \mathbb{R}^{NT \times NT}$                              |
| $S$                           | the Fourier Graph Operator                                                                                               |
| $d$                           | the embedding dimension                                                                                                  |
| $\mathbf{X}_t^{\mathcal{G}}$  | the embedding of $X_t^{\mathcal{G}}$ , $\mathbf{X}_t^{\mathcal{G}} \in \mathbb{R}^{NT \times d}$                         |
| $\mathcal{X}_t^{\mathcal{G}}$ | the spectrum of $\mathbf{X}_t^{\mathcal{G}}$ , $\mathcal{X}_t^{\mathcal{G}} \in \mathbb{C}^{NT \times d}$                |
| $\mathcal{Y}_t^{\mathcal{G}}$ | the output of FourierGNN, $\mathcal{Y}_t^{\mathcal{G}} \in \mathbb{C}^{NT \times d}$                                     |
| $\theta_g$                    | the parameters of the graph network                                                                                      |
| $\theta_t$                    | the parameters of the temporal network                                                                                   |
| $\theta_{\mathcal{G}}$        | the network parameters for hypervariate graphs                                                                           |
| $E_{\phi}$                    | the embedding matrix, $E_{\phi} \in \mathbb{R}^{1 \times d}$                                                             |
| $\kappa$                      | the kernel function                                                                                                      |
| $W$                           | the weight matrix                                                                                                        |
| $b$                           | the complex bias weights                                                                                                 |
| $\mathcal{F}$                 | Discrete Fourier Transform                                                                                               |
| $\mathcal{F}^{-1}$            | Inverse Discrete Fourier Transform                                                                                       |
| $F$                           | the forecasting model                                                                                                    |

**B Convolution Theorem**

The convolution theorem [26] is one of the most important properties of the Fourier transform. It states the Fourier transform of a convolution of two signals equals the pointwise product of their Fourier transforms in the frequency domain. Given a signal  $x[n]$  and a filter  $h[n]$ , the convolution theorem can be defined as follows:

$$\mathcal{F}((x * h)[n]) = \mathcal{F}(x)\mathcal{F}(h) \quad (9)$$

where  $(x * h)[n] = \sum_{m=0}^{N-1} h[m]x[(n - m)_N]$  denotes the convolution of  $x$  and  $h$ ,  $(n - m)_N$  denotes  $(n - m)$  modulo  $N$ , and  $\mathcal{F}(x)$  and  $\mathcal{F}(h)$  denote discrete Fourier transform of  $x[n]$  and  $h[n]$ , respectively.

## C Explanations and Proofs

### C.1 The Explanations of the Hypervariate Graph Structure

Note that the time lag effect between time-series variables is a common phenomenon in real-world multivariate time series scenarios, for example, the time lag influence between two financial assets (e.g. dollar and gold) of a portfolio. It is beneficial but challenging to consider dependencies between different variables under different timestamps.

The hypervariate graph connecting any two variables at any two timestamps aims to encode high-resolution spatiotemporal dependencies. It embodies not only the intra-series temporal dependencies (node connections of each individual variable), inter-series spatial dependencies (node connections under each single time step), and also the time-varying spatiotemporal dependencies (node connections between different variables at different time steps). By leveraging the hypervariate graph structure, we can effectively learn the spatial and temporal dependencies. This approach is distinct from previous methods that represent the spatial and temporal dependencies separately using two network structures.

### C.2 The Interpretation of $n$ -invariant FGO

**Why  $\mathcal{F}(\kappa) \in \mathbb{C}^{n \times d \times d}$ ?** From Definition 2, we know that the kernel  $\kappa$  is defined as a matrix-valued projection, i.e.,  $\kappa : [n] \times [n] \rightarrow \mathbb{R}^{d \times d}$ . Note that we assume  $\kappa$  is in the special case of the Green’s kernel, i.e., a translation-invariant kernel  $\kappa[i, j] = \kappa[i - j]$ . Accordingly,  $\kappa$  can be reduced:  $\kappa : [n] \rightarrow \mathbb{R}^{d \times d}$  where we can parameterize  $\mathcal{F}(\kappa)$  with a complex-valued matrix  $\mathbb{C}^{n \times d \times d}$ .

**What is  $n$ -invariant FGO?** Turning to our case of the fully-connected hypervariate graph, we can consider a special case of  $\kappa$ , i.e., a space-invariant kernel  $\kappa[i, j] = \kappa[\varrho]$  with  $\varrho$  being a constant scalar. Accordingly, we can parameterize FGO  $S$  with a  $n$ -invariant complex-valued matrix  $\mathbb{C}^{d \times d}$ .

**The interpretation of  $n$ -invariant FGO.** An  $n$ -invariant FGO is similar to a shared-weight convolution kernel or filter of CNNs that slide along  $([n] \times [n])$  input features, which effectively reduces parameter volumes and saves computation costs. Note that although we adopt the same transformation (i.e., the  $n$ -invariant FGO) over  $NT$  frequency points, we embed the raw MTS inputs in the  $d$ -dimension distributive space beforehand and then perform FourierGNN over MTS embeddings, which can be analogized as  $d$  convolution kernels/filters in each convolutional layer in CNNs. This can ensure FourierGNN is able to learn informative features/patterns to improve its model capacity (See the following analysis of the effectiveness of  $n$ -invariant FGO).

**The effectiveness of  $n$ -invariant FGO.** In addition, the  $n$ -invariant parameterized FGO is empirically proven effective to improve model generalization and achieve superior forecasting performance (See the ablation study in Section 5.3 for more details). Although parameterizing  $\mathcal{F}(\kappa) \in \mathbb{C}^{n \times d \times d}$  (i.e., an  $n$ -variant FGO) may be more powerful and flexible than the  $n$ -invariant FGO in terms of forecasting performance, it introduces much more parameters and training time costs, especially in case of multi-layer FourierGNN, and may obtain inferior performance due to inadequate training or overfitting. As indicated in Table 6, the FourierGNN with the  $n$ -invariant FGO achieves slightly better performance than that with the  $n$ -variant FGO on ECG and COVID-19, respectively. Notably, the FourierGNN with the  $n$ -variant FGO introduces a much larger parameter volume proportional to  $n$  and requires significantly more training time. In contrast,  $n$ -invariant FGO is  $n$ -agnostic and lightweight, which is a more wise and efficient alternative. These results confirm our design and verify the effectiveness and applicability of  $n$ -invariant FGO.

Table 6: Comparison between FourierGNN models with  $n$ -invariant FGO and  $n$ -variant FGO on the ECG and COVID-19 datasets.

| Datasets | Models         | Parameters (M) | Training (s/epoch) | MAE          | RMSE         | MAPE (%)     |
|----------|----------------|----------------|--------------------|--------------|--------------|--------------|
| ECG      | $n$ -invariant | <b>0.18</b>    | <b>12.45</b>       | <b>0.052</b> | 0.078        | <b>10.97</b> |
|          | $n$ -variant   | 82.96          | 104.06             | 0.053        | 0.078        | 11.05        |
| COVID-19 | $n$ -invariant | <b>1.06</b>    | <b>0.62</b>        | <b>0.123</b> | <b>0.168</b> | <b>71.52</b> |
|          | $n$ -variant   | 130.99         | 7.46               | 0.129        | 0.174        | 72.12        |

### 487 C.3 Proof of Proposition 1 and Interpretation of FourierGNN

488 **Proposition 1.** Given a graph  $G = (X, A)$  with node features  $X \in \mathbb{R}^{n \times d}$  and adjacency matrix  
 489  $A \in \mathbb{R}^{n \times n}$ , the recursive multiplication of FGOs in Fourier space is equivalent to multi-order  
 490 convolutions in the time domain:

$$\mathcal{F}^{-1}(\mathcal{F}(X)\mathcal{S}_{0:k}) = A_{k:0}XW_{0:k}, \quad s.t. \mathcal{S}_{0:k} = \prod_{i=0}^k \mathcal{S}_i, A_{k:0} = \prod_{i=0}^k A_i, W_{0:k} = \prod_{i=0}^k W_i$$

491 where  $A_0, \mathcal{S}_0, W_0$  are the identity matrix,  $A_k \in \mathbb{R}^{n \times n}$  corresponds to the  $k$ -th diffusion step sharing  
 492 the same sparsity pattern of  $A$ ,  $W_k \in \mathbb{R}^{d \times d}$  is the  $k$ -th weight matrix,  $\mathcal{S}_k \in \mathbb{C}^{d \times d}$  is the  $k$ -th FGO  
 493 satisfying  $\mathcal{F}(A_k X W_k) = \mathcal{F}(X)\mathcal{S}_k$ , and  $\mathcal{F}$  and  $\mathcal{F}^{-1}$  denote DFT and its inverse, respectively.

494 *Proof.* The proof aims to demonstrate the equivalence between the recursive multiplication of FGOs  
 495 in Fourier space and multi-order convolutions in the time domain. According to  $\mathcal{F}(A_k X W_k) =$   
 496  $\mathcal{F}(X)\mathcal{S}_k$ , we expand the multi-order convolutions  $A_{0:K}XW_{0:K}$  in the time domain using a set of  
 497 FGOs in Fourier space:

$$\begin{aligned} \mathcal{F}(A_K A_{K-1} \cdots A_0 X W_0 \cdots W_{K-1} W_K) &= \mathcal{F}(A_K (A_{K-1} \cdots A_0 X W_0 \cdots W_{K-1}) W_K) \\ &= \mathcal{F}(A_{K-1} \cdots A_0 X W_0 \cdots W_{K-1}) \mathcal{S}_K \\ &= \mathcal{F}(A_{K-1} (A_{K-2} \cdots A_0 X W_0 \cdots W_{K-2}) W_{K-1}) \mathcal{S}_K \\ &= \mathcal{F}(A_{K-2} \cdots A_0 X W_0 \cdots W_{K-2}) \mathcal{S}_{K-1} \mathcal{S}_K \\ &= \cdots \\ &= \mathcal{F}(X) \mathcal{S}_0 \cdots \mathcal{S}_{K-1} \mathcal{S}_K \\ &= \mathcal{F}(X) \mathcal{S}_{0:K} \end{aligned} \tag{10}$$

498 where it yields  $\mathcal{F}^{-1}(\mathcal{F}(X)\mathcal{S}_{0:K}) = A_{K:0}XW_{0:K}$  with  $\mathcal{S}_{0:K} = \prod_{i=0}^K \mathcal{S}_i, A_{K:0} = \prod_{i=0}^K A_i$  and  
 499  $W_{0:K} = \prod_{i=0}^K W_i$ . Proved.  $\square$

500 Thus, the FourierGNN can be rewritten as (for convenience, we exclude the non-linear activation  
 501 function  $\sigma$  and learnable bias parameters  $b$ ):

$$\mathcal{F}^{-1}\left(\sum_{k=0}^K \mathcal{F}(X)\mathcal{S}_{0:k}\right) = A_0 X W_0 + A_1 (A_0 X W_0) W_1 + \dots + A_{K:0} X W_{0:K} \tag{11}$$

502 From the right part of the above equation, we can observe that it assigns different weights to weigh  
 503 the information of different neighbors in each diffusion order. This property enable FourierGNN to  
 504 capture time-varying correlations, which is empirically verified in our experiments (See Appendix  
 505 H.2 for more details).

## 506 D Compared with Other Graph Neural Networks

507 **Graph Convolutional Networks.** Graph convolutional networks (GCNs) depend on the Laplacian  
 508 eigenbasis to perform the multi-order graph convolutions over a given graph structure. Compared  
 509 with GCNs, FourierGNN as an efficient alternative to multi-order graph convolutions has three main  
 510 differences: 1) No eigendecompositions or similar costly matrix operations are required. FourierGNN  
 511 transforms the input into Fourier domain by discrete Fourier transform (DFT) instead of graph Fourier  
 512 transform (GFT); 2) Explicitly assigning various importance to nodes of the same neighborhood  
 513 with different diffusion steps. FourierGNN adopts different Fourier Graph Operators  $\mathcal{S}$  in different  
 514 diffusion steps corresponding to the time-varying dependencies among nodes; 3) FourierGNN is  
 515 invariant to the discretization  $N, T$ . It parameterizes the graph convolution via Fourier bases invariant  
 516 graph structure and graph scale.

517 **Graph Attention Networks.** Graph attention networks (GATs) are non-spectral attention-based  
 518 graph neural networks. GATs use node representations to calculate the attention weights (i.e., edge  
 519 weights) varying with different graph attention layers. Accordingly, both GATs and FourierGNN do

not depend on eigendecompositions and adopt varying edge weights with different diffusion steps (layers). However, FourierGNN can efficiently perform graph convolutions in the Fourier space. For a complete graph, the time complexity of the attention calculation of  $K$  layers is proportional to  $Kn^2$  where  $n$  is the number of nodes, while a  $K$ -layer FourierGNN infers the graph structure in Fourier space with the time complexity proportional to  $n \log n$ . In addition, compared with GATs that implicitly achieve edge-varying weights with different layers, FourierGNN adopts different FGOs in different diffusion steps explicitly.

## E Experiment Details

### E.1 Datasets

We use seven public multivariate benchmarks for multivariate time series forecasting and these benchmark datasets are summarized in Table 7.

Table 7: Summary of datasets.

| Datasets    | Solar      | Wiki       | Traffic    | ECG  | Electricity | COVID-19   | METR-LA    |
|-------------|------------|------------|------------|------|-------------|------------|------------|
| Samples     | 3650       | 803        | 10560      | 5000 | 140211      | 335        | 34272      |
| Variables   | 592        | 2000       | 963        | 140  | 370         | 55         | 207        |
| Granularity | 1hour      | 1day       | 1hour      | -    | 15min       | 1day       | 5min       |
| Start time  | 01/01/2006 | 01/07/2015 | 01/01/2015 | -    | 01/01/2011  | 01/02/2020 | 01/03/2012 |

**Solar**<sup>1</sup>: This dataset is about solar power collected by National Renewable Energy Laboratory. We choose the power plant data points in Florida as the data set which contains 593 points. The data is collected from 2006/01/01 to 2016/12/31 with the sampling interval of every 1 hour.

**Wiki**<sup>2</sup>: This dataset contains a number of daily views of different Wikipedia articles and is collected from 2015/7/1 to 2016/12/31. It consists of approximately 145k time series and we randomly choose 2k from them as our experimental data set.

**Traffic**<sup>3</sup>: This dataset contains hourly traffic data from 963 San Francisco freeway car lanes. The traffic data are collected since 2015/01/01 with the sampling interval of every 1 hour.

**ECG**<sup>4</sup>: This dataset is about Electrocardiogram(ECG) from the UCR time-series classification archive [34]. It contains 140 nodes and each node has a length of 5000.

**Electricity**<sup>5</sup>: This dataset contains the electricity consumption of 370 clients and is collected since 2011/01/01. The data sampling interval is every 15 minutes.

**COVID-19**<sup>6</sup>: This dataset is about COVID-19 hospitalization in the U.S. states of California (CA) from 01/02/2020 to 31/12/2020 provided by the Johns Hopkins University with the sampling interval of every one day.

**METR-LA**<sup>7</sup>: This dataset contains traffic information collected from loop detectors in the highway of Los Angeles County from 01/03/2012 to 30/06/2012. It contains 207 sensors and the data sampling interval is every 5 minutes.

### E.2 Baselines

In experiments, we conduct a comprehensive comparison of the forecasting performance between our FourierGNN and representative and state-of-the-art (SOTA) models as follows.

<sup>1</sup><https://www.nrel.gov/grid/solar-power-data.html>

<sup>2</sup><https://www.kaggle.com/c/web-traffic-time-series-forecasting/data>

<sup>3</sup><https://archive.ics.uci.edu/ml/datasets/PEMS-SF>

<sup>4</sup><http://www.timeseriesclassification.com/description.php?Dataset=ECG5000>

<sup>5</sup><https://archive.ics.uci.edu/ml/datasets/ElectricityLoadDiagrams20112014>

<sup>6</sup><https://github.com/CSSEGISandData/COVID-19>

<sup>7</sup><https://github.com/liyaguang/DCRNN>

552 **VAR** [29]: VAR is a classic linear autoregressive model. We use the Statsmodels library (<https://www.statsmodels.org>) which is a Python package that provides statistical computations to  
553 realize the VAR.  
554

555 **DeepGLO** [31]: DeepGLO models the relationships among variables by matrix factorization and  
556 employs a temporal convolution neural network to introduce non-linear relationships. We download  
557 the source code from: <https://github.com/rajatsen91/deepglo>. We follow the recommended  
558 configuration as our experimental settings for wiki, electricity, and traffic datasets. For covid datasets,  
559 the vertical and horizontal batch size is set to 64, the rank of the global model is set to 64, the number  
560 of channels is set to [32, 32, 32, 1], and the period is set to 7.

561 **LSTNet** [30]: LSTNet uses a CNN to capture inter-variable relationships and an RNN to discover  
562 long-term patterns. We download the source code from: <https://github.com/laiguokun/LSTNet>. In our experiment, we use the recommended configuration where the number of CNN  
563 hidden units is 100, the kernel size of the CNN layers is 4, the dropout is 0.2, the RNN hidden units  
564 is 100, the number of RNN hidden layers is 1, the learning rate is 0.001 and the optimizer is Adam.  
565

566 **TCN** [6]: TCN is a causal convolution model for regression prediction. We download the source code  
567 from: <https://github.com/locuslab/TCN>. We utilize the same configuration as the polyphonic  
568 music task exemplified in the open source code where the dropout is 0.25, the kernel size is 5, the  
569 number of hidden units is 150, the number of levels is 4 and the optimizer is Adam.

570 **Reformer** [32]: Reformer combines the modeling capacity of a Transformer with an architecture  
571 that can be executed efficiently on long sequences and with small memory use. We download  
572 the source code from: <https://github.com/thuml/Autoformer>. We follow the recommended  
573 configuration as the experimental settings.

574 **Informer** [7]: Informer leverages an efficient self-attention mechanism to encode the dependen-  
575 cies among variables. We download the source code from: <https://github.com/zhouhaoyi/Informer2020>. We follow the recommended configuration as our experimental settings where the  
576 dropout is 0.05, the number of encoder layers is 2, the number of decoder layers is 1, the learning  
577 rate is 0.0001, and the optimizer is Adam.  
578

579 **Autoformer** [8]: Autoformer proposes a decomposition architecture by embedding the series de-  
580 composition block as an inner operator, which can progressively aggregate the long-term trend part  
581 from intermediate prediction. We download the source code from: <https://github.com/thuml/Autoformer>. We follow the recommended configuration as our experimental settings with 2 encoder  
582 layers and 1 decoder layer.  
583

584 **FEDformer** [20]: FEDformer proposes an attention mechanism with low-rank approximation in  
585 frequency and a mixture of expert decomposition to control the distribution shifting. We download the  
586 source code from: <https://github.com/MAZiqing/FEDformer>. We use FEB-f as the Frequency  
587 Enhanced Block and select the random mode with 64 as the experimental mode.

588 **SFM** [22]: On the basis of the LSTM model, SFM introduces a series of different frequency compo-  
589 nents in the cell states. We download the source code from: <https://github.com/z331565360/State-Frequency-Memory-stock-prediction>. We follow the recommended settings where the  
590 learning rate is 0.01, the frequency dimension is 10, the hidden dimension is 10 and the optimizer is  
591 RMSProp.  
592

593 **StemGNN** [4]: StemGNN leverages GFT and DFT to capture dependencies among variables in  
594 the frequency domain. We download the source code from: <https://github.com/microsoft/stemGNN>. We use the recommended configuration of stemGNN as our experiment setting where the  
595 optimizer is RMSProp, the learning rate is 0.0001, the number of stacked layers is 5, and the dropout  
596 rate is 0.5.  
597

598 **MTGNN** [11]: MTGNN proposes an effective method to exploit the inherent dependency relation-  
599 ships among multiple time series. We download the source code from: <https://github.com/nzhan/MTGNN>. Because the experimental datasets have no static features, we set the parameter  
600 load\_static\_feature to false. We construct the graph by the adaptive adjacency matrix and add the  
601 graph convolution layer. Regarding other parameters, we adopt the recommended settings.  
602

603 **GraphWaveNet** [15]: GraphWaveNet introduces an adaptive dependency matrix learning to cap-  
604 ture the hidden spatial dependency. We download the source code from: <https://github.com/>

nnzhan/Graph-WaveNet. Since our datasets have no prior defined graph structures, we use only adaptive adjacent matrix. We add a graph convolution layer and randomly initialize the adjacent matrix. We adopt the recommended configuration as our experimental settings where the learning rate is 0.001, the dropout is 0.3, the number of epochs is 50, and the optimizer is Adam.

**AGCRN** [2]: AGCRN proposes a data-adaptive graph generation module for discovering spatial correlations from data. We download the source code from: <https://github.com/LeiBAI/AGCRN>. We follow the recommended configuration as our experimental settings where the embedding dimension is 10, the learning rate is 0.003, and the optimizer is Adam.

**TAMP-S2GCNets** [9]: TAMP-S2GCNets explores the utility of MP to enhance knowledge representation mechanisms within the time-aware DL paradigm. We download the source code from: [https://www.dropbox.com/sh/n0ajd5l0tdeyb80/AABGn-ejfV1YtRwjf\\_L0A0sNa?dl=0](https://www.dropbox.com/sh/n0ajd5l0tdeyb80/AABGn-ejfV1YtRwjf_L0A0sNa?dl=0). TAMP-S2GCNets requires predefined graph topology and we use the California State topology provided by the source code as input. We adopt the recommended configuration as our experimental settings on COVID-19.

**DCRNN** [16]: DCRNN uses bidirectional graph random walk to model spatial dependency and recurrent neural network to capture the temporal dynamics. We download the source code from: <https://github.com/liyaguang/DCRNN>. We follow the recommended configuration as our experimental settings with the batch size is 64, the learning rate is 0.01, the input dimension is 2 and the optimizer is Adam. DCRNN requires a pre-defined graph structure and we use the adjacency matrix as the pre-defined structure provided by the METR-LA dataset.

**STGCN** [1]: STGCN integrates graph convolution and gated temporal convolution through spatial-temporal convolutional blocks. We download the source code from: [https://github.com/VeritasYin/STGCN\\_IJCAI-18](https://github.com/VeritasYin/STGCN_IJCAI-18). We use the recommended configuration as our experimental settings where the batch size is 50, the learning rate is 0.001 and the optimizer is Adam. STGCN requires a pre-defined graph structure and we leverage the adjacency matrix as the pre-defined structures provided by the METR-LA dataset.

**CoST** [19]: CoST separates the representation learning and downstream forecasting task and proposes a contrastive learning framework that learns disentangled season-trend representations for time series forecasting tasks. We download the source code from: <https://github.com/salesforce/CoST>. We set the representation dimension to 320, the learning rate to 0.001, and the batch size to 32. Inputs are min-max normalization, we perform a 70/20/10 train/validation/test split for the METR-LA dataset and 60/20/20 for the COVID-19 dataset.

### E.3 Evaluation Metrics

We use MAE (Mean Absolute Error), RMSE (Root Mean Square Error), and MAPE (Mean Absolute Percentage Error) as the evaluation metrics in the experiments.

Specifically, given the groundtruth at timestamps  $t$ ,  $Y_t = [\mathbf{x}_{t+1}, \dots, \mathbf{x}_{t+\tau}] \in \mathbb{R}^{N \times \tau}$ , and the predictions  $\hat{Y}_t = [\hat{\mathbf{x}}_{t+1}, \dots, \hat{\mathbf{x}}_{t+\tau}] \in \mathbb{R}^{N \times \tau}$  for future  $\tau$  steps at timestamp  $t$ , the metrics are defined as follows:

$$MAE = \frac{1}{\tau N} \sum_{i=1}^N \sum_{j=1}^{\tau} |x_{ij} - \hat{x}_{ij}| \quad (12)$$

$$RMSE = \sqrt{\frac{1}{\tau N} \sum_{i=1}^N \sum_{j=1}^{\tau} (x_{ij} - \hat{x}_{ij})^2} \quad (13)$$

$$MAPE = \frac{1}{\tau N} \sum_{i=1}^N \sum_{j=1}^{\tau} \left| \frac{x_{ij} - \hat{x}_{ij}}{x_{ij}} \right| \times 100\% \quad (14)$$

with  $x_{ij} \in Y_t$  and  $\hat{x}_{ij} \in \hat{Y}_t$ .

### E.4 Experimental Settings

We summarize the implementation details of the proposed FourierGNN as follows. Note that the details of the baselines are introduced in their corresponding descriptions (see Section E.2).

648 **Network details.** The fully connected feed-forward network (FFN) consists of three linear transfor-  
649 mations with *LeakyReLU* activations in between. The FFN is formulated as follows:

$$\begin{aligned}\mathbf{X}_1 &= \text{LeakyReLU}(\mathbf{Y}_t^G \mathbf{W}_1 + \mathbf{b}_1) \\ \mathbf{X}_2 &= \text{LeakyReLU}(\mathbf{X}_1 \mathbf{W}_2 + \mathbf{b}_2) \\ \hat{\mathbf{Y}} &= \mathbf{X}_2 \mathbf{W}_3 + \mathbf{b}_3\end{aligned}\tag{15}$$

650 where  $\mathbf{W}_1 \in \mathbb{R}^{(Td) \times d_1^{ffn}}$ ,  $\mathbf{W}_2 \in \mathbb{R}^{d_1^{ffn} \times d_2^{ffn}}$  and  $\mathbf{W}_3 \in \mathbb{R}^{d_2^{ffn} \times \tau}$  are the weights of the three  
651 layers respectively, and  $\mathbf{b}_1 \in \mathbb{R}^{d_1^{ffn}}$ ,  $\mathbf{b}_2 \in \mathbb{R}^{d_2^{ffn}}$  and  $\mathbf{b}_3 \in \mathbb{R}^\tau$  are the biases of the three layers  
652 respectively. Here,  $d_1^{ffn}$  and  $d_2^{ffn}$  are the dimensions of the three layers. In addition, we adopt a  
653 *ReLU* activation function in Equation 6.

654 **Training details.** We carefully tune the hyperparameters, including the embedding size, batch  
655 size,  $d_1^{ffn}$  and  $d_2^{ffn}$ , on the validation set and choose the settings with the best performance for  
656 FourierGNN on different datasets. Specifically, the embedding size and batch size are tuned over  
657  $\{32, 64, 128, 256, 512\}$  and  $\{2, 4, 8, 16, 32, 64, 128\}$  respectively. For the COVID-19 dataset, the  
658 embedding size is 256, and the batch size is set to 4. For the Traffic, Solar, and Wiki datasets, the  
659 embedding size is 128, and the batch size is set to 2. For the METR-LA, ECG, and Electricity  
660 datasets, the embedding size is 128, and the batch size is set to 32.

661 To reduce the number of parameters, we adopt a linear transform to reshape the original time  
662 domain representation  $\mathbf{Y}_t^G \in \mathbb{R}^{NT \times d}$  to  $\mathbf{Y}_t \in \mathbb{R}^{N \times T \times d}$ , and map  $\mathbf{Y}_t$  to a low-dimensional tensor  
663  $\mathbf{Y}_t \in \mathbb{R}^{N \times l \times d}$  with  $l < T$ . We then reshape  $\mathbf{Y}_t \in \mathbb{R}^{N \times (ld)}$  and feed it to FFN. We perform a grid  
664 search on the dimensions of FFN, i.e.,  $d_1^{ffn}$  and  $d_2^{ffn}$ , over  $\{32, 64, 128, 256, 512\}$  and tune the  
665 intermediate dimension  $l$  over  $\{2, 4, 6, 8, 12\}$ . The settings of the three hyperparameters over all  
666 datasets are shown in Table 8. By default, we set the diffusion step (layers)  $K = 3$  for all datasets.

Table 8: Dimension settings of FFN on different datasets. \* denotes that we feed the original time domain representation to FFN without the dimension reduction.

| Datasets    | Solar | Wiki | Traffic | ECG | Electricity | COVID-19 | META-LR |
|-------------|-------|------|---------|-----|-------------|----------|---------|
| $l$         | 6     | 2    | 2       | *   | 4           | 8        | 4       |
| $d_1^{ffn}$ | 64    | 64   | 64      | 64  | 64          | 256      | 64      |
| $d_2^{ffn}$ | 256   | 256  | 256     | 256 | 256         | 512      | 256     |

## 667 E.5 Details for Visualization Experiments

668 To verify the effectiveness of FourierGNN in learning the spatiotemporal dependencies on the  
669 hypervariate graph, we obtain the output of FourierGNN as the node representation, denoted as  $\mathbf{Y}_t^G =$   
670  $\text{IDFT}(\text{FourierGNN}(\mathbf{X}_t^G)) \in \mathbb{R}^{NT \times d}$  with Inverse Discrete Fourier Transform (IDFT). Then, we  
671 visualize the adjacency matrix  $\mathbf{A}$  calculated based the flatten node representation  $\mathbf{Y}_t^G \in \mathbb{R}^{NT \times d}$ ,  
672 formulated as  $\mathbf{A} = \mathbf{Y}_t^G (\mathbf{Y}_t^G)^T \in \mathbb{R}^{NT \times NT}$ , to show the variable correlations. Note that  $\mathbf{A}$  is  
673 normalized via  $\mathbf{A} / \max(\mathbf{A})$ . Since it is not feasible to directly visualize the huge adjacency matrix  
674  $\mathbf{A}$  of the hypervariate graph, we visualize its different subgraphs in Figures 3, 4, 9, and 10 to better  
675 verify the learned spatiotemporal information on the hypervariate graph from different perspectives.

676 Figure 3. We select 8 counties and visualize the correlations between 12 consecutive time steps for  
677 each selected county respectively. Figure 3 reflects the temporal correlations within each variable.

678 Figure 4: On the METR-LA dataset, we average its adjacency matrix  $\mathbf{A}$  over the temporal dimension  
679 (i.e., marginalizing  $T$ ) to  $\mathbf{A}' \in \mathbb{R}^{N \times N}$ . Then, we randomly select 20 detectors out of all  $N = 207$   
680 detectors and obtain their corresponding sub adjacency matrix ( $\mathbb{R}^{20 \times 20}$ ) from  $\mathbf{A}'$  for visualization.  
681 We further compare the sub-adjacency with the real road map (generated by the Google map tool) to  
682 verify the learned dependencies between different detectors.

683 Figure 9. Since we adopt a 3-layer FourierGNN, we can calculate four adjacency matrices based on  
684 the spectrum input  $\mathcal{X}_t^G$  of FourierGNN and the outputs of each layer in FourierGNN. Following the

way of visualization in Figure 4, we select 10 counties and two timestamps on the four adjacency matrices for visualization. Figure 9 shows the effects of each layer of FourierGNN in filtering or enhancing variable correlations.

Figure 10. On the COVID-19 dataset, we randomly select 10 counties out of  $N = 55$  counties and obtain their four sub-adjacency matrices of four consecutive days for visualization. Each of the four sub adjacency matrices  $\mathbb{R}^{10 \times 10}$  embodies the dependencies between counties in one day. Figure 10 reflects the time-varying dependencies between counties (i.e., variables).

## F Additional Results

To further evaluate the performance of our model FourierGNN in multi-step forecasting, we conduct more experiments on the Wiki, METR-LA, and ECG datasets, respectively. We compare our model FourierGNN with five models (including StemGNN [4], AGCRN [2], GraphWaveNet [15], MTGNN [11], and Informer [7]) on the Wiki dataset under different prediction lengths, and the results are shown in Table 9. From the table, we observe that FourierGNN outperforms other models on MAE, RMSE, and MAPE metrics for all the prediction lengths. On average, FourierGNN improves MAE, RMSE, and MAPE by 6.8%, 3.2%, and 22.9%, respectively. Among these models, AGCRN shows promising performances since it captures the spatial and temporal correlations adaptively. However, it fails to simultaneously capture spatiotemporal dependencies, limiting its forecasting performance. In contrast, our model captures comprehensive spatiotemporal dependencies simultaneously on a hypervariate graph for multivariate time series forecasting.

Table 9: Accuracy comparison under different prediction lengths on the Wiki dataset.

| Length<br>Metrics | 3            |              |              | 6            |              |              | 9            |              |              | 12           |              |              |
|-------------------|--------------|--------------|--------------|--------------|--------------|--------------|--------------|--------------|--------------|--------------|--------------|--------------|
|                   | MAE          | RMSE         | MAPE(%)      |
| GraphWaveNet [15] | 0.061        | 0.105        | 138.60       | 0.061        | 0.105        | 135.32       | 0.061        | 0.105        | 132.52       | 0.061        | 0.104        | 136.12       |
| StemGNN [4]       | 0.157        | 0.236        | 89.00        | 0.159        | 0.233        | 98.01        | 0.232        | 0.311        | 142.14       | 0.220        | 0.306        | 125.40       |
| AGCRN [2]         | 0.043        | 0.077        | 73.49        | 0.044        | 0.078        | 80.44        | 0.045        | 0.079        | 81.89        | 0.044        | 0.079        | 78.52        |
| MTGNN [11]        | 0.102        | 0.141        | 123.15       | 0.091        | 0.133        | 91.75        | 0.074        | 0.120        | 85.44        | 0.101        | 0.140        | 122.96       |
| Informer [7]      | 0.053        | 0.089        | 85.31        | 0.054        | 0.090        | 84.46        | 0.059        | 0.095        | 93.80        | 0.059        | 0.095        | 95.09        |
| <b>FourierGNN</b> | <b>0.040</b> | <b>0.075</b> | <b>58.18</b> | <b>0.041</b> | <b>0.075</b> | <b>60.43</b> | <b>0.041</b> | <b>0.076</b> | <b>60.95</b> | <b>0.042</b> | <b>0.077</b> | <b>62.62</b> |

Table 10: Accuracy comparison under different prediction lengths on the METR-LA dataset.

| Horizon<br>Metrics | 3            |              |              | 6            |              |              | 9            |              |              | 12           |              |              |
|--------------------|--------------|--------------|--------------|--------------|--------------|--------------|--------------|--------------|--------------|--------------|--------------|--------------|
|                    | MAE          | RMSE         | MAPE(%)      |
| DCRNN [16]         | 0.160        | 0.204        | 80.00        | 0.191        | 0.243        | 83.15        | 0.216        | 0.269        | 85.72        | 0.241        | 0.291        | 88.25        |
| STGCN [1]          | 0.058        | 0.133        | 59.02        | 0.080        | 0.177        | 60.67        | 0.102        | 0.209        | 62.08        | 0.128        | 0.238        | 63.81        |
| GraphWaveNet [15]  | 0.180        | 0.366        | 21.90        | 0.184        | 0.375        | 22.95        | 0.196        | 0.382        | 23.61        | 0.202        | 0.386        | 24.14        |
| MTGNN [11]         | 0.135        | 0.294        | <b>17.99</b> | 0.144        | 0.307        | <b>18.82</b> | 0.149        | 0.328        | <b>19.38</b> | 0.153        | 0.316        | <b>19.92</b> |
| StemGNN [4]        | 0.052        | 0.115        | 86.39        | 0.069        | 0.141        | 87.71        | 0.080        | 0.162        | 89.00        | 0.093        | 0.175        | 90.25        |
| AGCRN [2]          | 0.062        | 0.131        | 24.96        | 0.086        | 0.165        | 27.62        | 0.099        | 0.188        | 29.72        | 0.109        | 0.204        | 31.73        |
| Informer [7]       | 0.076        | 0.141        | 69.96        | 0.088        | 0.163        | 70.94        | 0.096        | 0.178        | 72.26        | 0.100        | 0.190        | 72.54        |
| CoST [19]          | 0.064        | 0.118        | 88.44        | 0.077        | 0.141        | 89.63        | 0.088        | <b>0.159</b> | 90.56        | 0.097        | 0.171        | 91.42        |
| <b>FourierGNN</b>  | <b>0.050</b> | <b>0.113</b> | 86.30        | <b>0.066</b> | <b>0.140</b> | 87.97        | <b>0.076</b> | <b>0.159</b> | 88.99        | <b>0.084</b> | <b>0.165</b> | 89.69        |

Furthermore, we compare our model FourierGNN with seven MTS models (including STGCN [1], DCRNN [16], StemGNN [4], AGCRN [2], GraphWaveNet [15], MTGNN [11], Informer [7], and CoST [19]) on the METR-LA dataset which has a predefined graph topology in the data, and the results are shown in Table 10. On average, we improve 5.7% on MAE and 2.5% on RMSE. Among these models, StemGNN achieves competitive performance because it combines GFT to capture the spatial dependencies and DFT to capture the temporal dependencies. However, it is also limited to simultaneously capturing spatiotemporal dependencies. CoST learns disentangled seasonal-trend representations for time series forecasting via contrastive learning and obtains competitive results. But, our model still outperforms CoST. Because, compared with CoST, our model not only can learn the dynamic temporal representations, but also capture the discriminative spatial representations. Besides, STGCN and DCRNN require pre-defined graph structures. But StemGNN and our model outperform them for all steps, and AGCRN outperforms them when the prediction lengths are 9 and 12. This also shows that a novel adaptive graph learning can precisely capture the hidden spatial dependency. In addition, we compare FourierGNN with the baseline models under the different



prediction lengths on the ECG dataset, as shown in Figure 5. It reports that FourierGNN achieves the best performances (MAE, RMSE, and MAPE) for all prediction lengths.

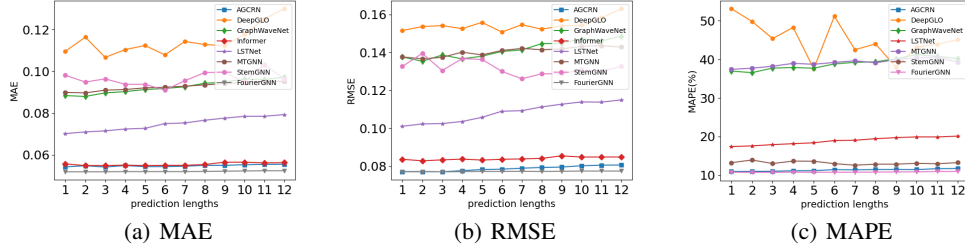

Figure 5: Performance comparison in multi-step prediction on the ECG dataset.

## G Further Analyses

### G.1 Scalability Analysis

We further conduct experiments on the Wiki dataset to investigate the performance of FourierGNN under different graph sizes ( $N \times T$ ). The results are shown in Figure 6, where Figure 6(a), Figure 6(b) and Figure 6(c) show MAE, RMSE, and MAPE at the different number of nodes, respectively. From these figures, we observe that FourierGNN keeps a leading edge over the other state-of-the-art MTS models as the number of nodes increases. The results demonstrate the superiority and scalability of FourierGNN on large-scale datasets.

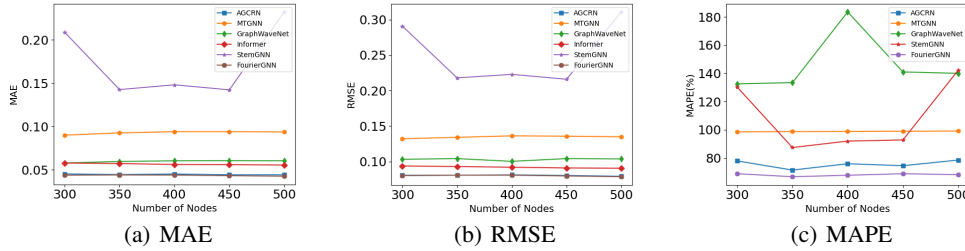

Figure 6: Scalability analyses in terms of MAE, RMSE, and MAPE under different number of nodes on the Wiki dataset.

### G.2 Parameter Analysis

We evaluate the forecasting performance of our model FourierGNN under different diffusion steps (layers) on the COVID-19 dataset, as illustrated in Table 11. The table shows that FourierGNN achieves increasingly better performance from  $K = 1$  to  $K = 4$  and achieves the best results when  $K = 3$ . With the further increase of  $K$ , FourierGNN obtains inferior performance. The results indicate that high-order diffusion information is beneficial for improving forecasting accuracy, but the diffusion information may gradually weaken the effect or even bring noises to forecasting with the increase of the order.

Table 11: Performance at different diffusion steps (layers) on the COVID-19 dataset.

|         | K=1   | K=2   | K=3          | K=4   |
|---------|-------|-------|--------------|-------|
| MAE     | 0.136 | 0.133 | <u>0.129</u> | 0.132 |
| RMSE    | 0.181 | 0.177 | <u>0.173</u> | 0.176 |
| MAPE(%) | 72.30 | 71.80 | <u>71.52</u> | 72.59 |

In addition, we conduct additional experiments on the ECG dataset to analyze the effect of the input lookback window length  $T$  and the embedding dimension  $d$ , as shown in Figure 7 and Figure 8, respectively. Figure 7 shows that the performance (including RMSE and MAPE) of FourierGNN

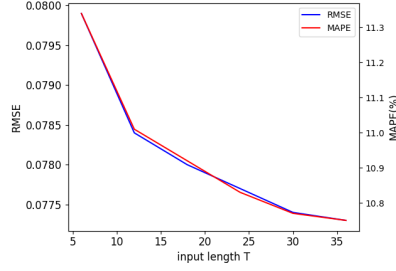

Figure 7: Influence of input window.

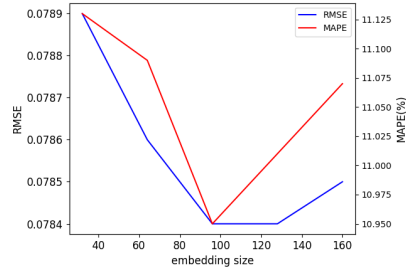

Figure 8: Influence of embedding size.

gets better as the input lookback window length increases, indicating that FourierGNN can learn a comprehensive hypervariate graph from long MTS inputs to capture the spatial and temporal dependencies. Moreover, Figure 8 shows that the performance (RMSE and MAPE) first increases and then decreases with the increase of the embedding size, which is attributed that a large embedding size improves the fitting ability of FourierGNN but it may easily lead to the overfitting issue especially when the embedding size is too large.

### G.3 Ablation Study

We provide more details about each variant used in this section and Section 5.3.

- **w/o Embedding.** A variant of FourierGNN feeds the raw MTS input instead of its embeddings into the graph convolution in the Fourier space.
- **w/o Dynamic FGO.** A variant of FourierGNN uses the same FGO for all diffusion steps instead of applying different FGOs in different diffusion steps. It corresponds to a vanilla graph filter.
- **w/o Residual.** A variant of FourierGNN does not have the  $K = 0$  layer output, i.e.,  $\mathcal{X}_t^g$ , in the summation.
- **w/o Summation.** A variant of FourierGNN adopts the last order (layer) output as the final frequency output of the FourierGNN.

We conduct another ablation study on the COVID-19 dataset to further investigate the effects of the different components of our FourierGNN. The results are shown in Table 12, which confirms the results in Table 4 and further verifies the effectiveness of each component in FourierGNN. Both Table 12 and Table 4 report that the embedding and dynamic FGOs in FourierGNN contribute more than the design of residual and summation to the state-of-the-art performance of FourierGNN.

Table 12: Ablation studies on the COVID-19 dataset.

| Metric  | w/o Embedding | w/o Dynamic FGO | w/o Residual | w/o Summation | FourierGNN   |
|---------|---------------|-----------------|--------------|---------------|--------------|
| MAE     | 0.157         | 0.138           | 0.131        | 0.134         | <u>0.129</u> |
| RMSE    | 0.203         | 0.180           | 0.174        | 0.177         | <u>0.173</u> |
| MAPE(%) | 76.91         | 74.01           | 72.25        | 72.57         | <u>71.52</u> |

## H Visualizations

### H.1 Visualization of the Diffusion Process in FourierGNN

To gain insight into the operation of the FGO, we visualize the frequency output of each layer in our FourierGNN. We select 10 counties from the COVID-19 dataset and visualize their adjacency matrices at two different timestamps, as shown in Figure 9. From left to right, the results correspond to the original spectrum of the input, as well as the outputs of the first, second, and third layers of the FourierGNN. From the top, we can find that as the number of layers increases, some correlation

values are reduced, indicating that some correlations are filtered out. In contrast, the bottom case illustrates some correlations are enhanced as the number of layers increases. These results show that FGO can adaptively and effectively capture important patterns while removing noises, enabling the learning of a discriminative model.

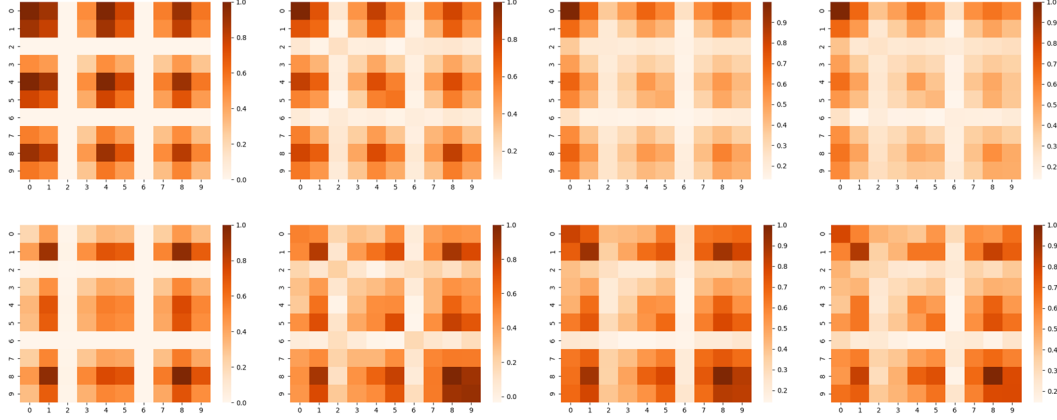

Figure 9: The diffusion process of FourierGNN at two timestamps (top and bottom) on COVID-19.

## 777 H.2 Visualization of Time-Varying Dependencies Learned by FourierGNN

778 Furthermore, we explore the capability of FourierGNN in capturing time-varying dependencies  
 779 among variables. To investigate this, we perform additional experiments to visualize the adjacency  
 780 matrix of 10 randomly-selected counties over four consecutive days on the COVID-19 dataset. The  
 781 visualization results, displayed as a heatmap in Figure 10, reveal clear spatial patterns that exhibit  
 782 continuous evolution in the temporal dimension. This is because FourierGNN can attend to the  
 783 time-varying variability of the spatiotemporal dependencies. These results verify that our model  
 784 enjoys the feasibility of exploiting the time-varying dependencies among variables.

785 Based on the insights gained from these visualization results, we can conclude that the hypervariate  
 786 graph structure exhibits strong capabilities to encode spatiotemporal dependencies. By incorporating  
 787 FGOs, FourierGNN can effectively attend to and exploit the time-varying dependencies among  
 788 variates. The synergy between the hypervariate graph structure and FGOs empowers FourierGNN to  
 789 capture and model intricate spatiotemporal relationships with remarkable effectiveness.

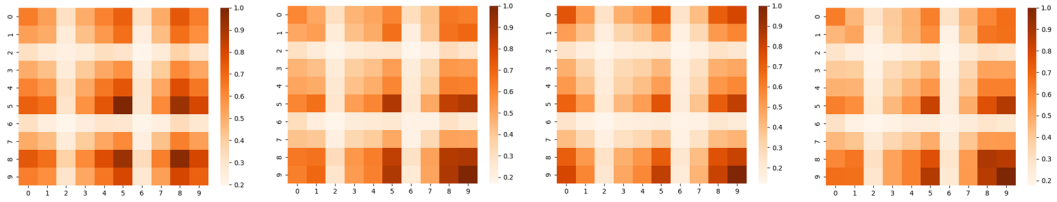

Figure 10: The adjacency matrix for four consecutive days on the COVID-19 dataset.
